# Supplementary material
Source: ML conference proceedings conference paper supplement (https://proceedings.mlr.press/v51/goldstein16.html)
Supplement: Supplementary file 1 [file goldstein16-supp.pdf]

# Supplementary Material

## A SVM Sub-steps for Consensus Optimization

A common formulation of the support vector machine (SVM) solves

$$\text{minimize} \quad \frac{1}{2}\|x\|^2 + Ch(Dx) \quad (16)$$

where  $C$  is a regularization parameter, and  $h$  is a simple ‘‘hinge loss’’ function given by  $h(z) = \sum_{k=1}^M \max\{1 - l_k z_k, 0\}$ . The proximal mapping of  $h$  has the form  $\text{prox}_h(z, \delta)_k = z_k + l_k \max\{\min\{1 - l_k z_k, \delta\}, 0\}$ . Using this proximal operator, the solution to the  $y$  update in (10) is simply  $y^{k+1} = \text{prox}_h(Dx^{k+1} + \lambda^k, \frac{C}{\tau})$ . Note that this algorithm is much simpler than the consensus implementation of SVM, which requires each node to solve the sub-problem

$$\text{minimize} \quad Ch(Dx) + \frac{\tau}{2}\|x - y\|^2. \quad (17)$$

Despite the similarity of this problem to the original SVM (16), this problem form is *not* supported by available SVM solvers such as LIBSVM [23] and others. However, techniques for the classical SVM problem can be easily adapted to solve (17).

A common numerical approach to solving (16) is the attack its dual, which is

$$\text{minimize}_{\alpha_i \in [0, C]} \quad \frac{1}{2}\|A^T L \alpha\|^2 - \alpha^T \mathbf{1} = \sum_{i,j} \alpha_i \alpha_j l_i l_j A_i A_j^T - \sum_i \alpha_i. \quad (18)$$

Once (18) is solved to obtain  $\alpha^*$ , the solution to (13) is simply given by  $w^* = L^T \alpha$ . The dual formulation (18) is advantageous because the constraints on  $\alpha$  act separately on each coordinate. The dual is therefore solved efficiently by coordinate descent, which is the approach used by the popular solver LIBSVM [23]. This method is particularly powerful when the number of support vectors in the solution is small, in which case most of the entries in  $\alpha$  assume the value 0 or  $C$ .

In the context of consensus ADMM, we must solve

$$\text{minimize} \quad \frac{1}{2}\|w\|^2 + Ch(Aw, l) + \frac{\tau}{2}\|w - z\|^2. \quad (19)$$

Following the classical SVM literature, we dualize this problem to obtain

$$\text{minimize}_{\alpha_i \in [0, C]} \quad \frac{1}{2}\|A^T L \alpha\|^2 - \alpha^T ((1 + \tau)\mathbf{1} - \tau Lz). \quad (20)$$

We then solve (20) for  $\alpha^*$ , and recover the solution via

$$w^* = \frac{A^T L \alpha + \tau z}{1 + \tau}.$$

We solve (20) using a dual coordinate descent method inspired by [23]. The implementation has  $O(M)$  complexity per iteration. Also following [23] we optimize the convergence by updating coordinates with the largest residual (derivative) on each pass.

Because our solver does not need to handle a ‘‘bias’’ variable (in consensus optimization, only the central server treats the bias variables differently from other unknowns), and by using a warm start to accelerate solve time across iterations, our coordinate descent method significantly outperforms even LIBSVM for each sub-problem. On a desktop computer with a Core i5 processor, LIBSVM solves the synthetic data test problem with  $m = 100$  datapoints and  $n = 200$  features in 3.4 seconds (excluding ‘‘setup’’ time), as opposed to our custom solver which solves each SVM sub-problem for the consensus SVM with the same dimensions (on a single processor) in 0.17 seconds (averaged over all iterations). When  $m = 10000$  and  $n = 20$ , LIBSVM requires over 20 seconds, while the average solve time for the custom solver embedded in the consensus method is only 2.3 seconds.

## B Tables of Results

In the following tables, we use these labels:

- N: Number of data points per core
- F: Number of features per data point
- Cores: Number of compute cores used in computation
- Space: Total size of data corpus in GB (truncated at GB)
- TWalltime: Walltime for transpose method (truncated at seconds)
- TCompute: Total computation time for transpose method (truncated at seconds)
- CWalltime: Walltime for consensus method (truncated at seconds)
- CCompute: Total computation time for consensus method (truncated at seconds)

Logistic regression with homogeneous data

| N      | F    | Cores | Space(GB) | TWalltime | TCompute        | CWalltime | CCompute        |
|--------|------|-------|-----------|-----------|-----------------|-----------|-----------------|
| 50000  | 2000 | 800   | 596       | 0:00:53   | 6:19:14         | 0:01:36   | 17:25:18        |
| 50000  | 2000 | 1600  | 1192      | 0:00:58   | 12:40:24        | 0:01:51   | 1 day 10:51:33  |
| 50000  | 2000 | 2400  | 1788      | 0:01:00   | 19:05:13        | 0:01:52   | 2 days 4:21:25  |
| 50000  | 2000 | 3200  | 2384      | 0:01:00   | 1 day 1:30:18   | 0:01:41   | 2 days 21:46:28 |
| 50000  | 2000 | 4000  | 2980      | 0:00:58   | 1 day 7:58:24   | 0:01:39   | 3 days 15:17:51 |
| 50000  | 2000 | 4800  | 3576      | 0:00:58   | 1 day 14:27:31  | 0:02:31   | 4 days 8:49:58  |
| 50000  | 2000 | 5600  | 4172      | 0:01:00   | 1 day 21:10:38  | 0:02:13   | 5 days 2:16:56  |
| 50000  | 2000 | 6400  | 4768      | 0:01:03   | 2 days 3:46:42  | 0:02:08   | 5 days 19:39:40 |
| 50000  | 2000 | 7200  | 5364      | 0:01:21   | 2 days 10:36:36 | 0:01:47   | 6 days 13:12:59 |
| 100000 | 1000 | 2000  | 1490      | 0:02:09   | 11:50:56        | 0:01:58   | 2 days 0:28:08  |
| 100000 | 1000 | 4000  | 2980      | 0:01:32   | 1 day 0:05:30   | 0:04:14   | 4 days 0:58:47  |
| 100000 | 1000 | 6000  | 4470      | 0:01:40   | 1 day 12:20:57  | 0:02:00   | 6 days 1:36:20  |
| 100000 | 1000 | 8000  | 5960      | 0:00:42   | 2 days 0:42:49  | 0:03:33   | 8 days 1:59:14  |
| 100000 | 1000 | 10000 | 7450      | 0:01:01   | 3 days 5:30:41  | 0:02:43   | 10 days 2:30:10 |
| 100000 | 1000 | 12000 | 8940      | 0:01:16   | 4 days 0:50:36  | 0:02:54   | 12 days 2:59:08 |
| 100000 | 1000 | 14000 | 10430     | 0:01:33   | 4 days 16:42:20 | 0:05:00   | 14 days 3:36:58 |
| 100000 | 1000 | 16000 | 11920     | 0:01:18   | 5 days 3:40:44  | 0:03:19   | 16 days 4:11:34 |
| 100000 | 1000 | 18000 | 13411     | 0:01:07   | 5 days 6:45:44  | 0:05:29   | 18 days 4:56:02 |
| 100000 | 1000 | 20000 | 14901     | 0:01:17   | 6 days 21:44:52 | 0:03:14   | 20 days 5:36:16 |
| 5000   | 2000 | 4800  | 357       | 0:00:33   | 4:04:11         | 0:00:26   | 21:01:22        |
| 10000  | 2000 | 4800  | 715       | 0:00:26   | 7:51:06         | 0:01:22   | 1 day 21:24:47  |
| 15000  | 2000 | 4800  | 1072      | 0:00:38   | 11:23:22        | 0:01:37   | 2 days 19:42:30 |
| 20000  | 2000 | 4800  | 1430      | 0:00:42   | 15:15:01        | 0:01:30   | 3 days 19:27:24 |
| 25000  | 2000 | 4800  | 1788      | 0:00:42   | 18:59:04        | 0:01:48   | 4 days 17:24:59 |
| 30000  | 2000 | 4800  | 2145      | 0:00:47   | 22:53:25        | 0:02:04   | 5 days 16:30:28 |
| 35000  | 2000 | 4800  | 2503      | 0:00:57   | 1 day 2:43:48   | 0:02:46   | 6 days 15:10:40 |
| 40000  | 2000 | 4800  | 2861      | 0:00:54   | 1 day 6:22:51   | 0:02:42   | 7 days 14:58:02 |
| 45000  | 2000 | 4800  | 3218      | 0:00:57   | 1 day 10:05:17  | 0:03:02   | 8 days 15:11:42 |
| 50000  | 2000 | 4800  | 3576      | 0:01:02   | 1 day 14:28:30  | 0:03:24   | 9 days 15:51:21 |
| 20000  | 500  | 4800  | 357       | 0:00:05   | 2:18:21         | 0:00:35   | 20:51:20        |
| 20000  | 1000 | 4800  | 715       | 0:00:12   | 5:33:31         | 0:01:40   | 1 day 18:43:21  |
| 20000  | 1500 | 4800  | 1072      | 0:00:25   | 9:44:07         | 0:01:08   | 2 days 20:08:20 |
| 20000  | 2000 | 4800  | 1430      | 0:00:31   | 15:10:01        | 0:01:29   | 3 days 19:28:56 |
| 20000  | 2500 | 4800  | 1788      | 0:01:23   | 1 day 12:24:25  | 0:03:30   | 4 days 20:53:53 |
| 20000  | 3000 | 4800  | 2145      | 0:01:50   | 1 day 20:29:59  | 0:03:44   | 5 days 19:45:31 |
| 20000  | 3500 | 4800  | 2503      | 0:02:27   | 2 days 5:40:09  | 0:03:56   | 6 days 19:44:54 |
| 20000  | 4000 | 4800  | 2861      | 0:03:03   | 2 days 16:50:51 | 0:03:46   | 7 days 18:17:21 |
| 20000  | 4500 | 4800  | 3218      | 0:04:00   | 3 days 3:35:02  | 0:04:28   | 8 days 19:49:26 |
| 20000  | 5000 | 4800  | 3576      | 0:04:52   | 3 days 16:50:21 | 0:04:44   | 9 days 23:56:16 |

**Logistic regression with heterogeneous data**

| N      | F    | Cores | Space(GB) | TWalltime | TCompute        | CWalltime | CCompute          |
|--------|------|-------|-----------|-----------|-----------------|-----------|-------------------|
| 50000  | 2000 | 800   | 596       | 0:00:56   | 6:14:57         | 0:09:25   | 3 days 19:56:38   |
| 50000  | 2000 | 1600  | 1192      | 0:01:01   | 12:28:12        | 0:09:35   | 7 days 19:00:17   |
| 50000  | 2000 | 2400  | 1788      | 0:00:58   | 18:43:11        | 0:09:35   | 11 days 13:26:10  |
| 50000  | 2000 | 3200  | 2384      | 0:00:58   | 1 day 1:09:09   | 0:09:39   | 15 days 10:33:19  |
| 50000  | 2000 | 4000  | 2980      | 0:01:23   | 1 day 7:34:22   | 0:09:49   | 19 days 6:45:31   |
| 50000  | 2000 | 4800  | 3576      | 0:01:11   | 1 day 13:51:15  | 0:34:30   | 77 days 5:23:50   |
| 50000  | 2000 | 5600  | 4172      | 0:01:29   | 1 day 20:20:50  | 0:34:38   | 90 day 19:10:12   |
| 50000  | 2000 | 6400  | 4768      | 0:01:01   | 2 days 2:55:20  | 0:35:31   | 103 days 19:09:22 |
| 50000  | 2000 | 7200  | 5364      | 0:01:14   | 2 days 9:38:02  | 0:10:26   | 34 days 20:11:28  |
| 100000 | 1000 | 2000  | 1490      | 0:01:31   | 11:15:47        | 0:26:49   | 23 days 21:30:59  |
| 100000 | 1000 | 4000  | 2980      | 0:01:03   | 22:44:45        | 0:25:23   | 48 days 17:23:23  |
| 100000 | 1000 | 6000  | 4470      | 0:00:42   | 1 day 10:38:14  | 0:24:38   | 73 days 15:10:07  |
| 100000 | 1000 | 8000  | 5960      | 0:00:43   | 1 day 22:25:35  | 0:25:08   | 98 days 12:53:22  |
| 100000 | 1000 | 10000 | 7450      | 0:00:56   | 2 days 10:13:27 | 0:25:39   | 123 days 0:26:26  |
| 100000 | 1000 | 12000 | 8940      | 0:01:24   | 2 days 22:10:47 | 0:25:00   | 146 days 22:00:35 |
| 100000 | 1000 | 14000 | 10430     | 0:01:16   | 4 days 11:33:53 | 0:26:27   | 171 days 8:40:10  |
| 100000 | 1000 | 16000 | 11920     | 0:00:56   | 3 days 22:59:09 | 0:25:18   | 195 days 19:54:41 |
| 100000 | 1000 | 18000 | 13411     | 0:01:26   | 4 days 11:34:10 | 0:26:03   | 218 days 19:17:19 |
| 100000 | 1000 | 20000 | 14901     | 0:01:59   | 4 days 23:59:15 | 0:26:27   | 243 days 4:55:47  |

**Lasso with heterogeneous data**

| N     | F    | Cores | Space(GB) | TWalltime | TCompute | CWalltime | CCompute      |
|-------|------|-------|-----------|-----------|----------|-----------|---------------|
| 50000 | 200  | 800   | 59        | 0:00:12   | 0:01:45  | 0:00:37   | 0:04:55       |
| 50000 | 200  | 1600  | 119       | 0:00:02   | 0:03:31  | 0:00:47   | 0:10:56       |
| 50000 | 200  | 2400  | 178       | 0:00:02   | 0:05:14  | 0:01:14   | 0:17:50       |
| 50000 | 200  | 3200  | 238       | 0:00:00   | 0:07:00  | 0:01:22   | 0:25:24       |
| 50000 | 200  | 4000  | 298       | 0:00:04   | 0:09:00  | 0:01:36   | 0:33:49       |
| 50000 | 200  | 4800  | 357       | 0:00:11   | 0:10:25  | 0:01:57   | 0:43:29       |
| 50000 | 200  | 5600  | 417       | 0:00:10   | 0:12:09  | 0:02:07   | 0:55:47       |
| 50000 | 200  | 6400  | 476       | 0:00:07   | 0:13:48  | 0:02:19   | 1:04:51       |
| 50000 | 200  | 7200  | 536       | 0:00:09   | 0:15:31  | 0:02:39   | 1:19:22       |
| 50000 | 1000 | 800   | 298       | 0:00:04   | 0:33:28  | 0:05:20   | 2:58:02       |
| 50000 | 1000 | 1600  | 596       | 0:00:18   | 1:06:33  | 0:06:23   | 6:00:37       |
| 50000 | 1000 | 2400  | 894       | 0:00:25   | 1:39:50  | 0:08:28   | 9:04:25       |
| 50000 | 1000 | 3200  | 1192      | 0:00:09   | 2:12:14  | 0:08:34   | 12:07:04      |
| 50000 | 1000 | 4000  | 1490      | 0:00:08   | 2:46:27  | 0:09:52   | 15:13:18      |
| 50000 | 1000 | 4800  | 1788      | 0:00:21   | 3:24:38  | 0:13:28   | 18:11:34      |
| 50000 | 1000 | 5600  | 2086      | 0:00:10   | 3:50:29  | 0:14:55   | 21:25:49      |
| 50000 | 1000 | 6400  | 2384      | 0:00:06   | 4:26:31  | 0:16:11   | 1 day 0:27:56 |
| 50000 | 1000 | 7200  | 2682      | 0:00:11   | 4:56:57  | 0:17:11   | 1 day 3:34:19 |

**SVM with homogeneous data**

| N     | F   | Cores | Space(GB) | TWalltime | TCompute | CWalltime | CCompute      |
|-------|-----|-------|-----------|-----------|----------|-----------|---------------|
| 50000 | 20  | 48    | 0         | 0:00:01   | 0:00:46  | 0:02:45   | 2:01:12       |
| 50000 | 20  | 96    | 0         | 0:00:01   | 0:01:32  | 0:02:47   | 4:03:05       |
| 50000 | 20  | 144   | 1         | 0:00:02   | 0:02:19  | 0:02:49   | 5:58:08       |
| 50000 | 20  | 192   | 1         | 0:00:02   | 0:03:06  | 0:02:45   | 7:56:14       |
| 50000 | 20  | 240   | 1         | 0:00:02   | 0:03:53  | 0:02:51   | 9:54:05       |
| 50000 | 50  | 48    | 0         | 0:00:03   | 0:01:23  | 0:05:14   | 3:44:06       |
| 50000 | 50  | 96    | 1         | 0:00:03   | 0:02:47  | 0:05:19   | 7:26:30       |
| 50000 | 50  | 144   | 2         | 0:00:03   | 0:04:11  | 0:05:25   | 11:07:51      |
| 50000 | 50  | 192   | 3         | 0:00:07   | 0:05:38  | 0:05:25   | 14:54:03      |
| 50000 | 50  | 240   | 4         | 0:00:03   | 0:07:00  | 0:05:25   | 18:26:10      |
| 50000 | 100 | 48    | 1         | 0:00:05   | 0:02:20  | 0:09:28   | 6:25:55       |
| 50000 | 100 | 96    | 3         | 0:00:05   | 0:04:40  | 0:09:56   | 12:49:20      |
| 50000 | 100 | 144   | 5         | 0:00:05   | 0:07:04  | 0:09:45   | 19:09:22      |
| 50000 | 100 | 192   | 7         | 0:00:06   | 0:09:25  | 0:09:53   | 1 day 1:27:47 |
| 50000 | 100 | 240   | 8         | 0:00:05   | 0:11:46  | 0:10:06   | 1 day 8:08:18 |

**Star data**

| Cores | TWalltime | TCompute | CWalltime | CCompute         |
|-------|-----------|----------|-----------|------------------|
| 2500  | 0:01:06   | 11:35:25 | 0:24:39   | 31 days 19:59:13 |
| 3000  | 0:00:49   | 12:10:33 | 0:21:43   | 32 days 2:44:11  |
| 3500  | 0:00:50   | 12:17:27 | 0:17:01   | 30 days 7:56:19  |
| 4000  | 0:00:45   | 12:38:24 | 0:29:53   | 40 days 13:38:19 |
